# Supplementary material for: Insights from mercury stable isotopes into factors affecting the internal body burden of methylmercury in frequent fish consumers
Source: Oxford University Press journal article supplement (doi:10.12952/journal.elementa.000103), 2016-01-01
Supplement: elementa_000103_s003.docx [file elementa_000103_s003.docx]

### Table S2. Demographic data corresponding to hair samples analyzed for Hg isotopes.

| **ID** | **Measured hair Hg (μg/g)** | **Modeled hair Hg (μg/g)** | **Age** | **Ethnicity** | **Sex** | **State** |
| --- | --- | --- | --- | --- | --- | --- |
|
|
| 1 | 0.04 | 4.91 | 27 | Other | F | CA |
| 2 | 0.02 | 3.5 | 61 | 2+ Races | M | NC |
| 3* | 0.01/0.02/0.01 | 3.68/3.76/1.07 | 51/42/54 | White/Black/White | F/F/F | FL/AL/OH |
| 4* | 0.02/0.02 | 1.2/0.74 | 43/21 | Black/Black | F/F | MI/CT |
| 5* | 0.06/0.09 | 4.01/7.20 | 30/51 | White/Hispanic | M/F | OK/CA |
| 6 | 0.07 | 3.43 | 69 | White | M | MD |
| 7* | 0.12/0.14 | 5.7/4.56 | 44/23 | White/Black | M/F | TX/NY |
| 8 | 0.08 | 3.19 | 40 | Hispanic | F | CA |
| 9 | 1.56 | 1.65 | 62 | 2+ Races | F | CA |
| 10 | 1.82 | 1.87 | 62 | 2+ Races | F | NM |
| 11 | 1.25 | 1.28 | 69 | White | F | TX |
| 12 | 1.92 | 1.93 | 56 | White | F | CA |
| 13 | 0.60 | 0.6 | 61 | White | F | NY |
| 14 | 2.26 | 2.21 | 61 | White | M | NV |
| 15 | 1.12 | 1.04 | 69 | White | F | VA |
| 16 | 1.53 | 1.41 | 56 | Other | F | CA |

**Composite sample*
