# Supplementary material for: Insights from mercury stable isotopes into factors affecting the internal body burden of methylmercury in frequent fish consumers
Source: Oxford University Press journal article supplement (doi:10.12952/journal.elementa.000103), 2016-01-01
Supplement: elementa_000103_s005.docx [file elementa_000103_s005.docx]

### Table S4. Linear regression of the natural log of discrepancy between modeled and measured hair Hg levels (R square =0.29).

|  | **β-coefficient** | **SE** | **p-value** |
| --- | --- | --- | --- |
| **Age (years)** | -0.01 | 0.004 | 0.003* |
| **Shellfish (% of total consumption)** | 0.23 | 0.26 | 0.38 |
| **Gender** |  |  |  |
| Female | Referent |  |  |
| Male | 0.08 | 0.13 | 0.54 |
| **Body Mass Index** |  |  |  |
| Normal weight | Referent |  |  |
| Underweight | 0.42 | 0.31 | 0.18 |
| Overweight | 0.12 | 0.16 | 0.44 |
| Obese | 0.24 | 0.17 | 0.15 |
| **Education** |  |  |  |
| Bachelor’s degree or higher | Referent |  |  |
| High school | 0.20 | 0.21 | 0.34 |
| Less than high school | 0.09 | 0.46 | 0.84 |
| Some college | 0.07 | 0.14 | 0.63 |
| **Ethnicity** |  |  |  |
| 2+race | Referent |  |  |
| Black, Non-Hispanic | 0.61 | 0.34 | 0.08 |
| Hispanic | 0.11 | 0.35 | 0.75 |
| Other, Non-Hispanic | 0.05 | 0.38 | 0.90 |
| White, Non-Hispanic | 0.04 | 0.29 | 0.89 |
| **Household Income** |  |  |  |
| Less than $20K | Referent |  |  |
| $20K - <50K | -0.73 | 0.22 | 0.001* |
| $50K - <100K | -0.66 | 0.21 | 0.002* |
| ≥100K | -0.93 | 0.24 | 0.0001* |
| **Geographic regions** |  |  |  |
| East-North Central | Referent |  |  |
| East-South Central | 1.01 | 0.35 | 0.004* |
| Mid-Atlantic | -0.38 | 0.25 | 0.13 |
| Mountain | 0.10 | 0.30 | 0.74 |
| New England | -0.001 | 0.37 | 0.99 |
| Pacific | -0.57 | 0.23 | 0.02* |
| South Atlantic | 0.15 | 0.22 | 0.52 |
| West-North Central | 0.06 | 0.31 | 0.84 |
| West-South Central | 0.54 | 0.29 | 0.06 |

*Denotes statistically significant predictor.
